# Supplementary material for: Engineered Dwarf Male-Sterile Rice: A Promising Genetic Tool for Facilitating Recurrent Selection in Rice
Source: PubMed Central journal article supplement (PMC5733493; doi:10.3389/fpls.2017.02132), 2017-12-13
Supplement: Data_Sheet_1.pdf [file Data_Sheet_1.pdf]

## Supplementary Materials for

# Engineered Dwarf Male-Sterile Rice: A Promising Genetic Tool for Facilitating Recurrent Selection in Rice

Afsana Ansari<sup>1,4,†</sup>, Chunlian Wang<sup>1,†</sup>, Jian Wang<sup>1,2,†</sup>, Fujun Wang<sup>1,3,†</sup>, Piqing Liu<sup>3</sup>, Ying Gao<sup>1</sup>, Yongchao Tang<sup>1</sup> and Kaijun Zhao<sup>1\*</sup>

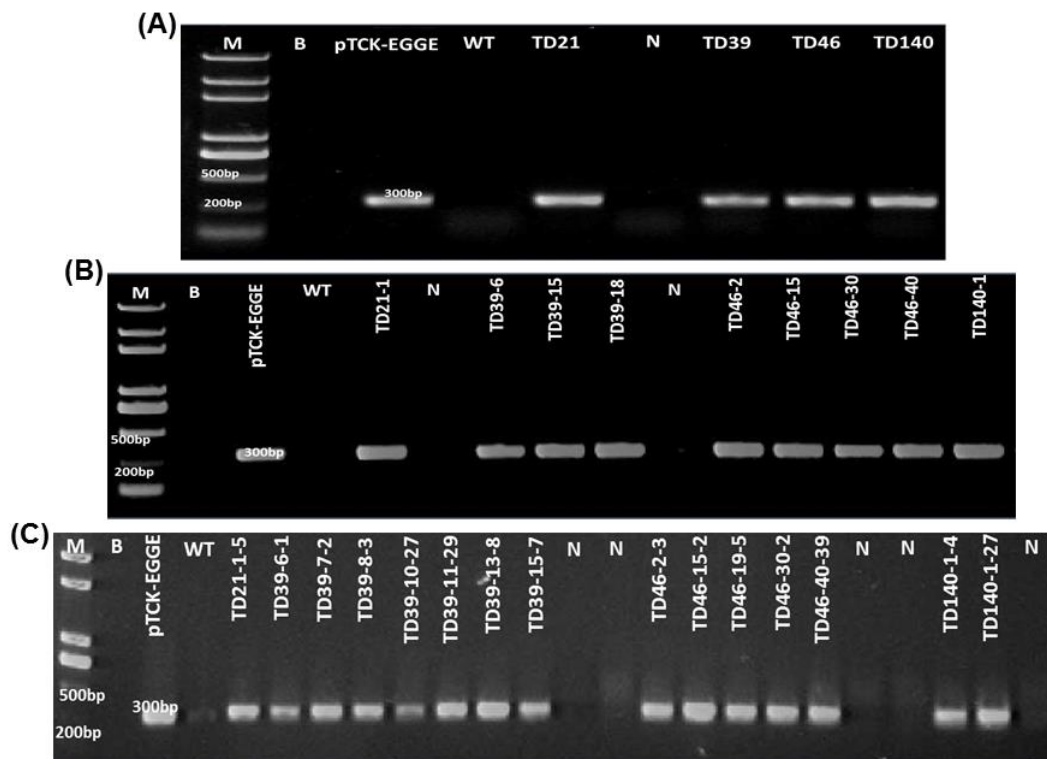

**Supplementary Figure S1** PCR analysis of transgenic rice plants with gene-specific primers AJCF/AJCR. (A-C) T0, T1 and T2 generations, respectively. Lanes: M, 2000 plus DNA ladder, B, blank, WT, non-transformed control plant, pTCK-EGGE, positive control (plasmid), N, negative plants.

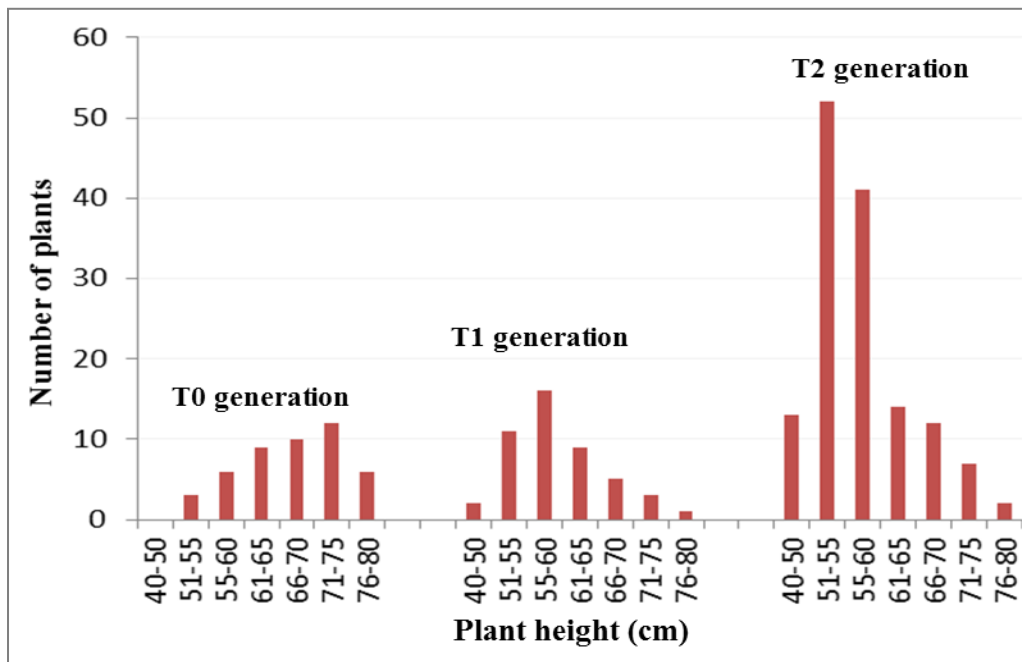

**Supplementary Figure S2** Distribution of pTCK-EGGE induced DMS rice plants in terms of plant height at ripening stage in T0, T1 and T2 generations.

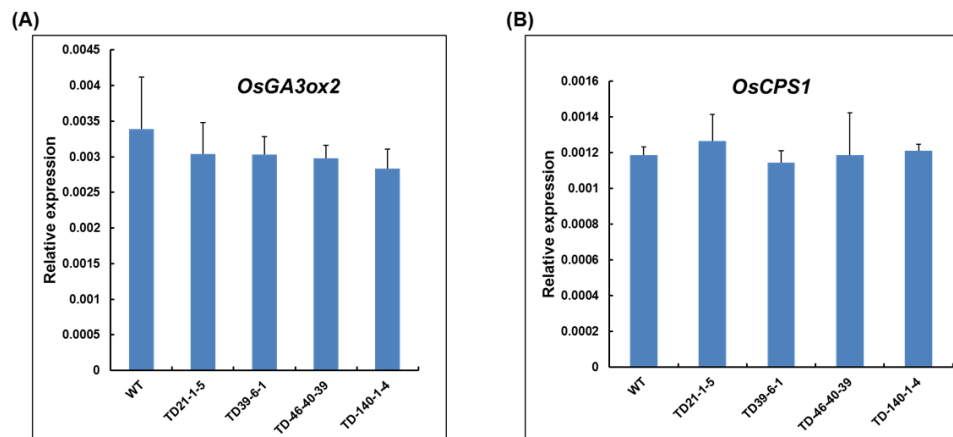

**Supplementary Figure S3** Expression patterns of *OsGA3ox2* and *OsCPS1* in DMS rice and the wild-type Z0201. **(A)** Relative expression levels of *OsGA3ox2* in stem internodes of transgenic DMS rice lines and wild type (WT) at heading stage. **(B)** Relative expression levels of *OsCPS1* in stem internodes of transgenic DMS rice lines and wild type (WT) at heading stage. The rice *Ubi* gene was used as an internal control. The data are shown as mean values  $\pm$  SD from three replicates. No significant difference is detected (one-tail t-test, compared with WT).

**Supplementary Table S1 Comparison of some morphological characters between pTCK-RGGR-transgenic DMS rice and wild-type plants**

| Traits | Wild type    | pTCK-RGGR-transgenic Plants |
|--------|--------------|-----------------------------|
| PH     | 114.67± 2.52 | 48.67±3.6**                 |
| MS     | Fertile      | No/undeveloped pollen**     |
| ET/P   | 8.67±0.58    | 15.33±2.52*                 |
| PL     | 25.83±1.04   | 22.17±1.04*                 |
| SP/Pn  | 210.00±10.00 | 171.67±10.41*               |

Mean values calculated from 3 plants of wild type (Z0201) or pTCK-RGGR-transgenic Plants (T0) as per the standard evaluation system of rice at IRRI; Significance was determined by t-test; Values were presented as mean ± SE; Length is in cm; PH, Plant height (cm); MS, Male sterility; ET/P, Number of effective tillers per plant; PL, Panicle length (cm); SP/Pn, Number of spikelets per panicle. \*, 5% level of significance; \*\*, 1% level of significance.

**Supplementary Table S2 Morphological characters of pTCK-EGGE-induced DMS rice plants**

|       | T0 generation (in Beijing) |                       |    | T1 generation (in Sanya) |                                |    | T2 generation (in Beijing) |                                |    |
|-------|----------------------------|-----------------------|----|--------------------------|--------------------------------|----|----------------------------|--------------------------------|----|
|       | WT                         | DMS Plants            |    | WT                       | DMS Plants                     |    | WT                         | DMS Plants                     |    |
| PH    | 112.67±11.59               | 69.9±10.7             | ** | 115.67±10.06             | 71.33±9.71                     | ** | 111.00±7.87                | 66.58±12.86                    | ** |
| MS    | Fertile                    | No/undeveloped pollen | ** | Fertile                  | No/undeveloped /sterile pollen | ** | Fertile                    | No/undeveloped /sterile pollen | ** |
| ET/P  | 9.67±2.08                  | 11.2±6.34             | NS | 4.66±0.57                | 6.21±3.85                      | NS | 4.25±1.26                  | 6.04±2.86                      | NS |
| PL    | 25.83±1.04                 | 24.50±2.72            | NS | 25.66±2.08               | 23.41±3.85                     | NS | 23.25±3.28                 | 20.4±4.11                      | NS |
| SP/Pn | 210.00±10.00               | 186.30±20.28          | *  | 198.33±10.41             | 183.75±37.96                   | NS | 185.5±17.82                | 166.38±43.86                   | NS |
| DTH   | NA                         | NA                    |    | 79.00±2.00               | 72.16±3.47                     | ** | 109.00±9.59                | 98.83±15.44                    | NS |
| DTM   | NA                         | NA                    |    | 105.00±2.00              | 98.00±3.43                     | ** | 134.75±9.91                | 124.89±15.46                   | NS |

Mean values calculated from 3 plants of wild type (WT), all DMS plants of pTCK-EGGE RNAi lines from T0, T1 and T2 generation as per the standard evaluation system of rice at IRRI; Statistical significant was determined by t-test; Values were presented as mean ± SE; Length is in cm; NA, not available. PH, Plant height (cm); MS, Male sterility; ET/P, Number of effective tiller per plant; PL, Panicle length (cm); SP/Pn, Number of spikelet per panicle; DTH, Days to heading; DTM, Days to maturity; \*, 5% level of significance; \*\*, 1% level of significance; NS, Non-significant.

**Supplementary Table S3 Primers used in this study**

| Name    | Sequence (from 5' to 3')                           | Feature and for experiment                                 |
|---------|----------------------------------------------------|------------------------------------------------------------|
| GaF-Rts | <u>TGCTCCACCTCGCTCTGATT</u> TCTCATCTCCAATCTCATGG   | <u>OsRTS-adapter</u> added, for fragment GA20              |
| GaR-Sp  | CC <u>ACTAGT</u> ACCATGAAGGTGTCGCCGAT              | <u>SpeI</u> site added, for fragment GA20                  |
| RtsF-Sa | TAGAGCT <u>CGCAATGGT</u> GAGAGTTGCTGCCG            | <u>SacI</u> site added, for fragment of RTS                |
| RtsR-Ga | <u>CCATGAGATTGGAGATGAGAAAT</u> CAGAGCGAGGTGGAGCAGC | <u>OsGA20ox2-adapter</u> added, for RTS                    |
| RtsF-B  | <u>ATGGATCCGCAATGGT</u> GAGAGTTGCTGCCG             | <u>BamHI</u> site added, for sense RTS-GA20                |
| GaR-K   | <u>TAGGTACC</u> ACCATGAAGGTGTCGCCGAT               | <u>KpnI</u> site added, for sense RTS-GA20 and DGF         |
| GaF-Eat | <u>GGTGAGTTCGGAAAGGGCAAT</u> TCTCATCTCCAATCTCATGG  | <u>OsEAT1-adapter</u> added, for fragment GA20             |
| EatF-Sa | TAGAGCTCTTTGGAGCAAGAGGTTCCCC                       | <u>SacI</u> site added, for fragment of EAT                |
| EatR-Ga | <u>CCATGAGATTGGAGATGAGATT</u> GCCCTTTCCGAACTCACC   | <u>OsGA20ox2-adapter</u> added, for fragment EAT           |
| EatF-B  | <u>ATGGATCC</u> TTTGGAGCAAGAGGTTCCCC               | <u>BamHI</u> site added, for fragment EAT                  |
| EatR-B  | <u>ACCATCTGACC</u> CTAACTGGAGAGCTGAATCAC           | <u>Adapter</u> added, for mutation of the <i>KpnI</i> site |
| GaF-K   | <u>GTTAGGGT</u> CAGATGGTACTCAATCTCATCTAAT          | <u>Adapter</u> added, for mutation of the <i>KpnI</i> site |
| AJCF    | CTTACAGGAGTAGCAGCGGT                               | for PCR analysis of transgenic plants                      |
| AJCR    | CTCGGCCACCATGAGATTGG                               | for PCR analysis of transgenic plants                      |
| Ga20QF  | TGTCGCTGACGATCATGGAA                               | for qPCR analysis of <i>OsGA20ox2</i> gene                 |
| Ga20QR  | TCCGCGAAGAACTCCCTGTA                               | for qPCR analysis of <i>OsGA20ox2</i> gene                 |
| EatQF1  | AAGAAGGCCAACTCTCTGCT                               | for qPCR analysis of <i>OsEAT1</i> gene                    |
| EatQR1  | CGCCGAACCTTCTGATACCT                               | for qPCR analysis of <i>OsEAT1</i> gene                    |
| UbqF    | GCTCCGTGGCGGTATCAT                                 | for qPCR analysis of ubiquitin gene                        |
| UbqR    | CGGCAGTTGACAGCCCTAG                                | for qPCR analysis of ubiquitin gene                        |
| Ga3QF   | GACGACTACCTCCTCTTCTGTGACGTG                        | for qPCR analysis of <i>OsGA3ox2</i> gene                  |
| Ga3QR   | GAAGCCCGAGTCCGTGTGCGCGATG                          | for qPCR analysis of <i>OsGA3ox2</i> gene                  |
| Cps1F   | GAACGTTTACCCGGTCGATC                               | for qPCR analysis of <i>OsCPS1</i> gene                    |
| Cps1R   | CTTCAGTCCAGTGCCTGTTG                               | for qPCR analysis of <i>OsCPS1</i> gene                    |

## Supplementary Table S4 Nucleotide sequence of the fragments in the RNAi vectors

| Fragment                   | Nucleotide sequence                                                                                                                                                                                                                                                                                                                                                                                                                                                                                                                                                                                                                                                                                                                                                                                                                                                                                                                                                                                                                                                              |
|----------------------------|----------------------------------------------------------------------------------------------------------------------------------------------------------------------------------------------------------------------------------------------------------------------------------------------------------------------------------------------------------------------------------------------------------------------------------------------------------------------------------------------------------------------------------------------------------------------------------------------------------------------------------------------------------------------------------------------------------------------------------------------------------------------------------------------------------------------------------------------------------------------------------------------------------------------------------------------------------------------------------------------------------------------------------------------------------------------------------|
| EAT in sense               | GATCCAGCTATCTGCACTATAACCAGATCATATCATCAACCATCAGTTTAGCGAAGATCCACAAAAC<br>ATATTGGTGGAGCAACAGATCCAGCAGTATGATTCTGCACTTTATCCAAATGGTGTTTACACACCT<br>GCACCAGATCTCCTAATCTTATGCAGTGCACAAATGGCTCCAGCATCCCGGCAACGACATCCGTA<br>TTCGGTGACACAACACTGAATGGTACTAATACTTTGGATCTTAAACGGTGAACCTACAGGAGTAGCA<br>GCGGTTCCAGACAGTGGGAGTGGGTTGATGTTTGTAGTATTGATTCAGCTCTCCAGTTAGGGTCAGAT<br>GGTACTCAATCTCATCTAATAAAAGGATATCTGCCACTCGTTGCCCAAAAATTATGGGTTGTTTCCC<br>AGTGAGGACGAACGAGATGTGATTATTGGTGTGGAAAGTGGAGATCTTTTTCAGGAGATAGATGA<br>CAGGCAGTTTGATAGTGTACTTGAATGCAGGAGAGGGAAGGGTGAGTTCGGAAAGGGCAA                                                                                                                                                                                                                                                                                                                                                                                                                                                                                                        |
| EAT in antisense           | <u>TTTGGAGCAAGAGGTTCCCCAGTAGAACTGCAAACTGG</u> GATCCAGCTATCTGCACTATAACCAG<br>ATCATATCATCAACCATCAGTTTAGCGAAGATCCACAAAACATATTGGTGGAGCAACAGATCCAG<br>CAGTATGATTCTGCACTTTATCCAAATGGTGTTTACACACCTGCACCAGATCTCCTTAATCTTATGC<br>AGTGACAAATGGCTCCAGCATTCCCGGCAACGACATCCGTATTTCGGTGACACAACACTGAATGGT<br>ACTAACTATTTGGATCTTAAACGGTGAACCTACAGGAGTAGCAGCGGTTCCAGACAGTGGGAGTGG<br>GTTGATGTTTGTAGTATTGATTCAGCTCTCCAGTTAGGGTACCATGGTACTCAATCTCATCTAATAAA<br>GGATATCTGCCACTCGTTGCCCAAAAATTATGGGTTGTTTCCAGTGAGGACGAACGAGATGTGAT<br>TATTGGTGTGGAAAGTGGAGATCTTTTTCAGGAGATAGATGACAGGCAGTTTGATAGTGTACTTGA<br>ATGCAGGAGAGGGAAGGGTGAGTTCGGAAAGGGCAA                                                                                                                                                                                                                                                                                                                                                                                                                                                      |
| GA20 in sense or antisense | TCTCATCTCCAATCTCATGGTGGCCGAGCACCCACGCCACCACAGCCGCACCAACCACCGCCCAT<br>GGACTCCACCGCCGGCTCTGGCATTGCCGCCCGGGCGGCGGGCGGGTGTGCGACCTGAGGATGG<br>AGCCAAAGATCCCGGAGCATTCTGTGGCCGAACGGCGACGCGAGGCCGGCGTCGGCGGGCGGA<br>GCTGGACATGCCCGTGGTTCGACGTGGGGCTGCTCCGCGACGGCGACGCCGAGGGGCTGCGCCGCG<br>CCGCGGGCAGGTGGCCGCCGCTGCGCCACGCACGGGTTCTTCCAGGTGTCCGAGCACGGCGTC<br>GACGCCGCTCTGGCGCGCCGCGCTCGACGGCGCCAGCGACTTCTTCCGCTCCCGCTCGCCGAG<br>AAGCGCCGCGCGCCGCGTCCCGGCCACCGTGTCCGGCTACACCAGCGCCACGCCGACCGCTT<br>CGCCTCCAAGCTCCCATGGAAGGAGACCCTCCTTTCGGCTTCCAGACCGCGCCGCGCCCGCTT<br>CGTCGCCGACTACTTCTCCAGCACCCCTCGGCCCGACTTCCGCGCAATGGGGTAATTAACGATG<br>GTGGACGACATTGCATTTCAAATTCAAAACAAATTCAAAACACACCGACCGAGATTATGCTGAAT<br>TCAAACGCGTTTGTGCGCGCAGGAGGGTGTACCAGAAGTACTGCGAGGAGATGAAGGAGCTGTCC<br>CTGACGATCATGGAACCTCTGGAGCTGAGCCTGGGCGTGGAGCGAGGCTACTACAGGGAGTTCTT<br>CGCGGACAGCAGCTCAATCATGCGGTGCAACTACTACCCGCCATGCCCGGAGCCGGAGCGGACGC<br>TCGGCACGGGCCCGACTGCGACCCACCGCCCTACCATCCTCTCCAGGACGACGTGCGCGGCC<br>TCGAGGTCTCTGTCGACGGCGAATGGCGCCCCGTCAGCCCCGTCCCGCGGCCATGGTTCATCAACA<br>TCGGCGACACCTTCATGGT |
| RTS in sense or antisense  | GCAATGGTGAGAGTTGCTGCCGCCGCGGGTGTCTCGTGTGGCGGGCGGGCGGGCGGGCGGGC<br>GGCCATGGCCGCGGAGCCGCCACCGATGACGGCGCGGTCCGGTGGCGGGCGGGGCTGACGAAGT<br>GCGTGTCCGGGTGCGGTAGCAAGGTGACCTCCTGCTGCTCGGCTGCTACGGCGGGCGGGCGGGC<br>GCCCGCGCCGCGGACGGCGATGCCGTTCTGCGTCACTCGGCTCACACGCGACGCTTGTCTCTGC<br>GCCACCGGCTGCTCCACCTCGCTCTGATT                                                                                                                                                                                                                                                                                                                                                                                                                                                                                                                                                                                                                                                                                                                                                                      |

The internal *KpnI* restriction site GGTAAC (blue, in antisense EAT) was mutated as GGTCAG (yellow, in sense EAT). The 40 nucleotides (green) in antisense EAT was cut off in the sense EAT due to the *BamHI* restriction site GGATCC (underlined) during the cloning processes (Figure 3D-F).
